# Supplementary material for: Impact of land-use change in mountain semi-dry meadows on plants, litter decomposition and earthworms
Source: Copernicus journal article supplement (doi:10.5194/we-19-53-2019), 2019-08-28
Supplement: Supplementary file 1 [file we-19-53-2019-supplement.pdf]

Supplement of Web Ecol., 19, 53–63, 2019  
<https://doi.org/10.5194/we-19-53-2019-supplement>  
© Author(s) 2019. This work is distributed under  
the Creative Commons Attribution 4.0 License.

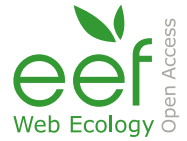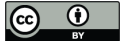

*Supplement of*

## **Impact of land-use change in mountain semi-dry meadows on plants, litter decomposition and earthworms**

**Ines Jernej et al.**

*Correspondence to:* Ines Jernej ([ines.jernej@gmx.net](mailto:ines.jernej@gmx.net))

The copyright of individual parts of the supplement might differ from the CC BY 4.0 License.

**Supplementary Table S1**

**Table S1:** Further information of site characteristics of abandoned and managed mountain meadows during the measurement period.

|                              | <b>Abandoned meadows</b> | <b>Managed meadows</b> |
|------------------------------|--------------------------|------------------------|
| <b>Exposition</b>            | South-facing slopes      | South-facing slopes    |
| <b>Soil type</b>             | Cambisol                 | Cambisol               |
| <b>Soil moisture (%)</b>     | 33.48 ± 7.96             | 34.63 ± 5.48           |
| <b>Soil temperature (°C)</b> | 23.36 ± 4.65             | 22.89 ± 5.73           |
| <b>Size (m<sup>2</sup>)</b>  | 573 – 3,370              | 1,095 – 4,500          |
